# Supplementary material
Source: Elsevier journal article supplement (https://www.sciencedirect.com/science/article/pii/S0213911117301954)
Supplement: mmc1 [file S0213911117301954:mmc1.docx]

I. Encuesta.

*TEXTO EXPLICATIVO*

*Hola, estamos realizando un estudio para conocer distintos aspectos de la relación entre los médicos residentes con la industria farmacéutica en la Comunidad de Madrid. Para ello nos gustaría realizarte unas preguntas. La participación es voluntaria. Se asegurará la confidencialidad y anonimato de los datos, según la Ley 15/1999 de Protección de datos. Muchas gracias por tu colaboración.*

**BLOQUE 1. TIPO Y FRECUENCIA DE ACTIVIDADES PROMOCIONALES ACEPTADAS**

Señala la frecuencia con la que has aceptado alguno de estos regalos/propuestas de la industria farmacéutica durante el periodo de la actual residencia:

|  | Una vez por semana | Una vez al mes | Una vez al año | Otra | Nunca |
| --- | --- | --- | --- | --- | --- |
| Un pequeño regalo no relacionado con formación (p ej. bolígrafo, libreta, etc) |  |  |  |  |  |
| Un regalo no relacionado con la práctica profesional (valor estimado superior a 30 euros) |  |  |  |  |  |
| Un libro o material de trabajo (p ej estetoscopio) |  |  |  |  |  |
| Una muestra gratuita de un fármaco |  |  |  |  |  |
| Un aperitivo (p ej. café, tapa, dulce) |  |  |  |  |  |
| Una comida, cena u otro evento social |  |  |  |  |  |
| Una charla financiada por una empresa farmacéutica |  |  |  |  |  |
| El pago de la inscripción/viaje a algún evento (congreso, jornada, etc) |  |  |  |  |  |
| La obtención de una beca o premio |  |  |  |  |  |
| La visita de un representante farmacéutico |  |  |  |  |  |
| La participación en una investigación financiada por una empresa farmacéutica |  |  |  |  |  |
| La participación en un estudio de mercado financiado por una empresa farmacéutica |  |  |  |  |  |

**BLOQUE 2. ACTITUDES Y PERCEPCIONES**

¿Cómo de acuerdo estás con las siguientes afirmaciones?

|  | Muy de acuerdo | De acuerdo | Neutral | En desacuerdo | Muy en desacuerdo |
| --- | --- | --- | --- | --- | --- |
| Los regalos/propuestas de la industria farmacéutica influyen en mi prescripción |  |  |  |  |  |
| Los regalos/propuestas de la industria farmacéutica influyen en la prescripción de mis compañeros residentes |  |  |  |  |  |
| Los regalos/propuestas de la industria farmacéutica influyen en la prescripción de otros médicos del servicio/centro |  |  |  |  |  |
| Los regalos/propuestas de la industria farmacéutica influyen en la prescripción de mi tutor |  |  |  |  |  |
| La financiación recibida de la industria farmacéutica por las sociedades científicas influye en sus actividades y recomendaciones |  |  |  |  |  |
| Las actividades de formación médica continuada hechas con el soporte de la industria farmacéutica confunden con frecuencia los contenidos docentes con los promocionales |  |  |  |  |  |
| Algunas veces está bien que los residentes acepten el pago por parte de una empresa farmacéutica de la inscripción/viaje a algún evento porque su sueldo es limitado |  |  |  |  |  |
| Algunas veces es aceptable acudir a una comida o cena financiada por un laboratorio porque tiene mínima influencia en los residentes |  |  |  |  |  |
| Cuando voy a una charla de otro médico me fijo en su declaración de conflictos de interés |  |  |  |  |  |
| Mi centro/hospital debería controlar las visitas de representantes farmacéuticos |  |  |  |  |  |
| El médico debería controlar sus visitas de representantes farmacéuticos |  |  |  |  |  |

**BLOQUE 3. PERCEPCIÓN DEL ENTORNO DEL RESIDENTE Y CONOCIMIENTO DEL MARCO REGULATORIO.**

¿Cómo de acuerdo estás con las siguientes afirmaciones?

|  | Muy de acuerdo | De acuerdo | Neutral | En desacuerdo | Muy en desacuerdo |
| --- | --- | --- | --- | --- | --- |
| Es fácil encontrar médicos en mi centro/servicio preocupados por la relación entre médico e industria farmacéutica |  |  |  |  |  |
| Mi tutor/En mi servicio se suele aceptar regalos y propuestas de la industria farmacéutica |  |  |  |  |  |
| Mi tutor/servicio me facilita el acceso a regalos y propuestas de la industria farmacéutica |  |  |  |  |  |

¿Existe en tu lugar de trabajo alguna directriz o normativa que regule las interacciones entre médico e industria farmacéutica?

Sí No No sé

¿Has recibido un código ético de manejo de la relación profesional con la industria farmacéutica por parte de tu colegio de médicos?

Sí No

¿Existe en tu sociedad científica algún documento o consenso que regule las interacciones entre ésta y la industria?

Sí No No sé

¿Conoces la legislación vigente en cuanto a las relaciones entre médico e industria farmacéutica?

Sí No

**BLOQUE 4. FORMACIÓN EN HABILIDADES ESPECÍFICAS**

¿Has abordado en tu período formativo las relaciones profesionales con la industria farmacéutica? Se puede señalar más de una respuesta.

No

Sí, en mi etapa universitaria en clase u otro entorno formal.

Sí, en mi etapa universitaria en un entorno informal (p ej. sesiones organizadas por estudiantes).

Sí, en mi etapa de residente, en sesiones docentes u otro entorno formal.

Sí, en mi etapa de residente, en un entorno informal con compañeros.

¿Te consideras preparado para reconocer los conflictos de interés que pueden aparecer en tu relación con la industria farmacéutica?

Nada preparado Algo preparado Muy preparado

¿Consideras necesario más espacio en tu período formativo para reflexionar sobre las relaciones que se establecen con la industria farmacéutica?

Sí No No sé

Marca con qué frecuencia usas los siguientes recursos para informarte sobre fármacos y productos sanitarios:

|  | Frecuentemente | Alguna vez | Nunca |
| --- | --- | --- | --- |
| Sesiones del centro |  |  |  |
| Congresos, jornadas |  |  |  |
| Boletines farmacoterapéuticos |  |  |  |
| Información de representantes farmacéuticos |  |  |  |
| Protocolos clínicos de actuación y/o abordaje de patologías |  |  |  |
| Guías de práctica clínica basadas en la evidencia |  |  |  |
| Buscadores inespecíficos (p ej. Google) |  |  |  |
| Búsqueda artículos en bases de datos (p ej. PubMed, Embase...) |  |  |  |
| Informalmente con compañeros |  |  |  |

Consideras que la formación recibida sobre búsqueda de evidencia terapéutica es:

Nula Insuficiente Suficiente Excelente

¿Te consideras preparado para realizar una lectura crítica de un artículo científico?

Nada preparado Algo preparado Muy preparado

**VARIABLES SOCIODEMOGRÁFICAS Y DE FORMACIÓN**

Edad

Sexo

Especialidad

Año de residencia: R1 R2 R3 R4 R5

¿Tienes otra especialidad? Sí No

País de formación universitaria: España Otro país

II. Elaboración del Índice Sintético de relación con la Industria Farmacéutica (ISIF)

|  | +1 si responde… | 0 si responde…. | -1 si responde... |
| --- | --- | --- | --- |
| Un pequeño regalo no relacionado con formación (p ej. bolígrafo, libreta, etc) | Una vez por semana, al mes |  | Nunca, otra, una vez al año |
| Un regalo no relacionado con la práctica profesional (valor estimado superior a 30 euros) | Una vez por semana, al mes, al año, otra |  | Nunca |
| Un libro o material de trabajo (p ej. estetoscopio) | Una vez por semana, al mes, | Una vez al año, otra | Nunca |
| Una muestra gratuita de un fármaco | Una vez por semana, al mes, | Una vez al año, otra | Nunca |
| Un aperitivo (p ej. café, tapa, dulce) | Una vez por semana, al mes |  | Nunca, otra, una vez al año |
| Una comida, cena u otro evento social | Una vez por semana, al mes, | Una vez al año, otra | Nunca |
| Una charla financiada por una empresa farmaceútica | Una vez por semana, al mes | una vez al año, otra | Nunca |
| El pago de la inscripción/viaje a algún evento (congreso, jornada, etc) | Una vez por semana, al mes, al año, otra |  | Nunca |
| La obtención de una beca o premio | Una vez por semana, al mes, al año, otra |  | Nunca |
| La visita de un representante farmacéutico | Una vez por semana, al mes | Una vez al año, otra | Nunca |
| La participación en una investigación financiada por una empresa farmacéutica | Una vez por semana, al mes, otra, una vez al año |  | Nunca |
| La participación en un estudio de mercado financiado por una empresa farmacéutica | Una vez por semana, al mes, al año, otra |  | Nunca |

|  | +1 si responde… | -1 si responde... |
| --- | --- | --- |
| Los regalos/propuestas de la industria farmacéutica influyen en mi prescripción | Neutral, Desacuerdo o Muy en desacuerdo | Muy de acuerdo o De acuerdo |
| Los regalos/propuestas de la industria farmacéutica influyen en la prescripción de mis compañeros residentes | Neutral, Desacuerdo o Muy en desacuerdo | Muy de acuerdo o De acuerdo |
| Los regalos/propuestas de la industria farmacéutica influyen en la prescripción de otros médicos del servicio/centro | Neutral, Desacuerdo o Muy en desacuerdo | Muy de acuerdo o De acuerdo |
| Los regalos/propuestas de la industria farmacéutica influyen en la prescripción de mi tutor | Neutral, Desacuerdo o Muy en desacuerdo | Muy de acuerdo o De acuerdo |
| Algunas veces está bien que los residentes acepten el pago por parte de una empresa farmacéutica de la inscripción/viaje a algún evento porque su sueldo es limitado | Muy de acuerdo o De acuerdo | Neutral, Desacuerdo o Muy en desacuerdo |
| Algunas veces es aceptable acudir a una comida o cena financiada por un laboratorio porque tiene mínima influencia en los residentes | Muy de acuerdo o De acuerdo | Neutral, Desacuerdo o Muy en desacuerdo |
| Cuando voy a una charla de otro médico me fijo en su declaración de conflictos de interés | Neutral, Desacuerdo o Muy en desacuerdo | Muy de acuerdo o De acuerdo |
| Las actividades de formación médica continuada hechas con el soporte de la industria farmacéutica confunden con frecuencia los contenidos docentes con los promocionales | Neutral, Desacuerdo o Muy en desacuerdo | Muy de acuerdo o De acuerdo |
| La financiación recibida de la industria farmacéutica por las sociedades científicas influye en sus actividades y recomendaciones | Neutral, Desacuerdo o Muy en desacuerdo | Muy de acuerdo o De acuerdo |
| Mi centro/hospital debería controlar las visitas de representantes farmacéuticos | Neutral, Desacuerdo o Muy en desacuerdo | Muy de acuerdo o De acuerdo |
| El médico debería controlar sus visitas de representantes farmacéuticos | Neutral, Desacuerdo o Muy en desacuerdo | Muy de acuerdo o De acuerdo |

III. Especialidades representadas en las respuestas dentro de cada grupo.

| **Especialidades Hospitalarias** | **n** | **%** |
| --- | --- | --- |
| Clínicas | 131 | 39,3 |
| Quirúrgicas | 11 | 3,3 |
| Médico-quirúrgicas | 31 | 9,3 |
| Laboratorio/Diagnóstico | 18 | 5,4 |
| **Total** | **191** | **57,3** |
|  |  |  |
| **Medicina Familiar y Comunitaria** |  |  |
|  | **93** | **27,9** |
|  |  |  |
| **Otras especialidades** |  |  |
| Medicina del Trabajo | 16 | 4,8 |
| Medicina Preventiva y Salud Pública | 33 | 9,9 |
| **Total** | **49** | **14,7** |
|  |  |  |
| **TOTAL** | **333** | **100** |
